# Supplementary material for: Tonic interferon restricts pathogenic IL-17-driven inflammatory disease via balancing the microbiome
Source: eLife journal article supplement (doi:10.7554/elife.68371), 2021-08-11
Supplement: supp [file elife-68371-supp-v1.zip]

Archive with 17 entries (17 files):
- elife_poa_e68371_Figure_1_figure_supplement_1.pdf
- elife_poa_e68371_Figure_4_figure_supplement_1.pdf
- elife_poa_e68371_Figure_6_figure_supplement_1.pdf
- elife_poa_e68371_Figure_6_figure_supplement_2.pdf
- elife_poa_e68371_Figure_7_figure_supplement_1.pdf
- elife_poa_e68371_Figure_7_figure_supplement_2.pdf
- elife_poa_e68371_Figure_7_figure_supplement_3.pdf
- elife_poa_e68371_Supplementary_file_1.docx
- elife_poa_e68371_Supplementary_file_2.docx
- elife_poa_e68371_Figure_1_source_data_1.xlsx
- elife_poa_e68371_Figure_2_source_data_1.xlsx
- elife_poa_e68371_Figure_3_source_data_1.xlsx
- elife_poa_e68371_Figure_3_source_data_2.xlsx
- elife_poa_e68371_Figure_4_source_data_1.xlsx
- elife_poa_e68371_Figure_7_source_data_1.xlsx
- elife_poa_e68371_Figure_7_figure_supplement_2_source_data_1.xlsx
- elife_poa_e68371_Transparent_Reporting_File.docx
