# Supplementary material for: Tonic interferon restricts pathogenic IL-17-driven inflammatory disease via balancing the microbiome
Source: eLife journal article supplement (doi:10.7554/elife.68371), 2021-08-11
Supplement: supp [file elife-68371-supp-v1.zip › elife_poa_e68371_Figure_1_figure_supplement_1.pdf]

Figure 1-figure supplement 1

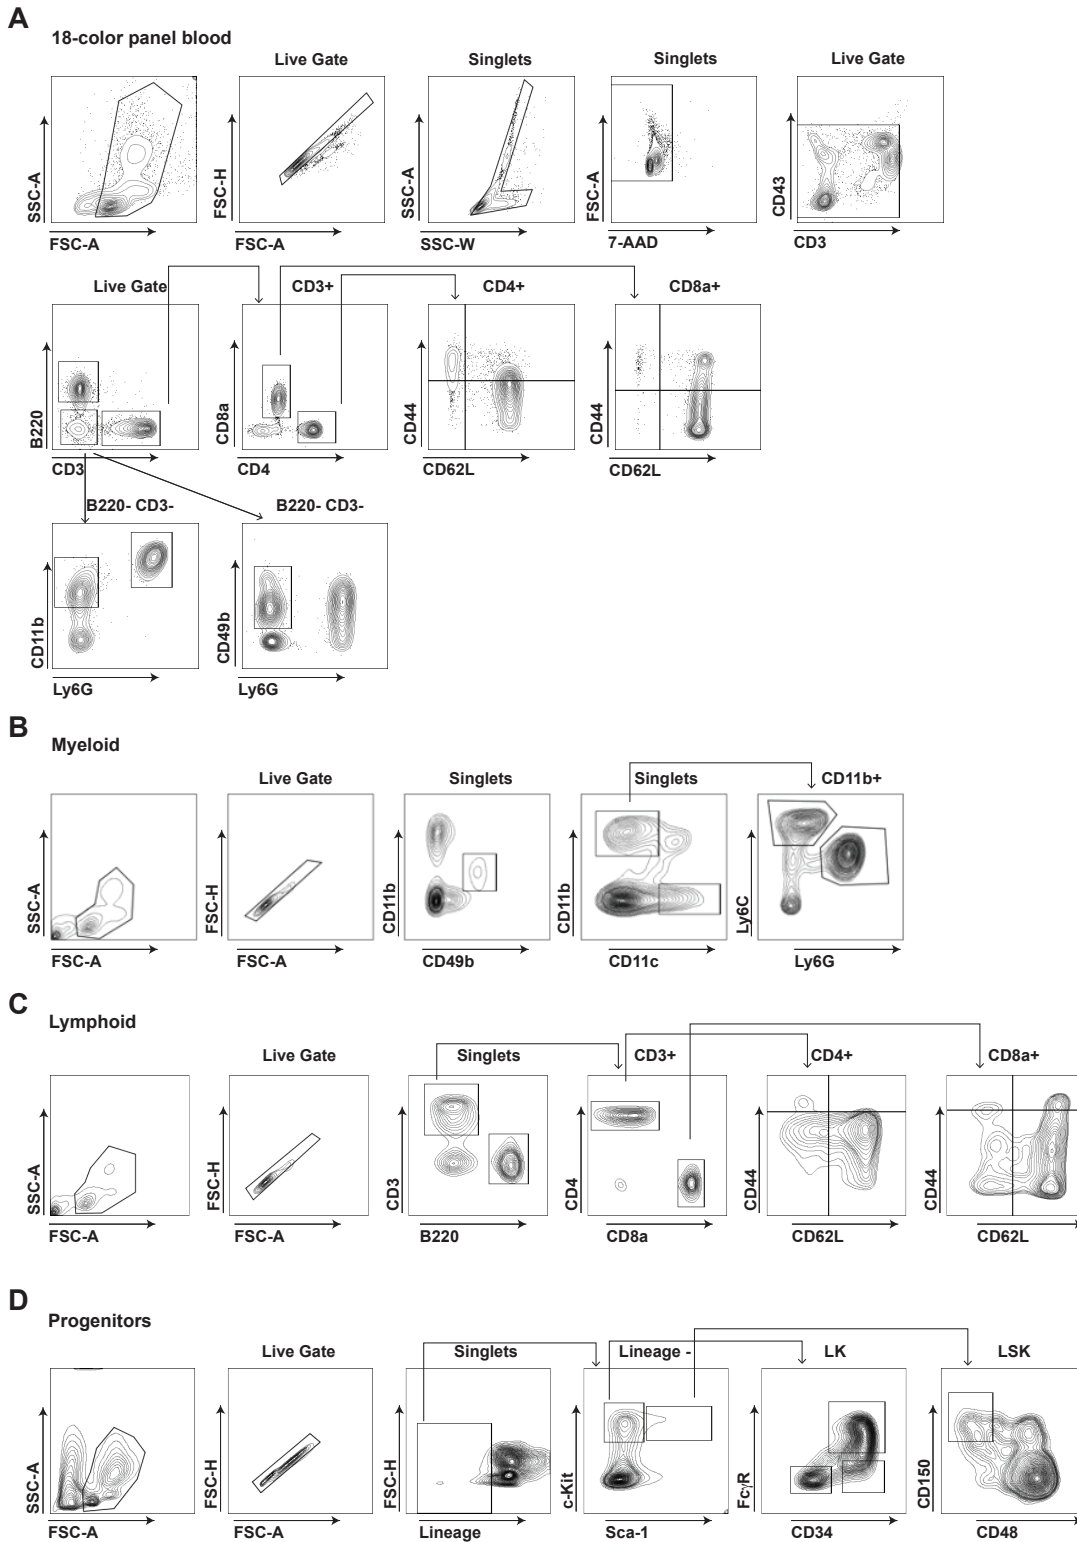

Figure 1-figure supplement 1: Gating strategies of multi-parameter flow cytometry analysis on blood (A) and for myeloid (B), lymphoid (C) and progenitor subsets (D) from bone marrow and spleen.
