# Supplementary material for: Tonic interferon restricts pathogenic IL-17-driven inflammatory disease via balancing the microbiome
Source: eLife journal article supplement (doi:10.7554/elife.68371), 2021-08-11
Supplement: supp [file elife-68371-supp-v1.zip › elife_poa_e68371_Figure_1_source_data_1.xlsx]

## Sheet: Fig1A
WT							STAT1KO
0.1189	0.1085	0.123	0.0723	0.0724	0.131	0.108		1.0378	0.4379	0.541	0.884	0.71	0.87	0.498

## Sheet: Fig 1B
			WT										STAT1 KO
WBC	12.93	10.14	11.51	9.21	7.91	8.76		252.61	132.95	210.66	152.98	198.34	100.67	103.99	242.55	145.8	108.96	142.48
Neutrophils	1.75	1.02	1.3	1.56	1.07	1.37		136.46	59.64	92.21	46.42	100.9	46.67	45.8	120.74	73.04	55.92	70.51
Monocytes	0.15	0.13	0.22	0.23	0.16	0.24		13.53	7.09	14.31	5.44	9.73	5.75	5.01	6.91	6.19	9.27	5.98

## Sheet: Fig1D
		WT					STAT1 KO
B cells	48.3	68.8	41.4	49.8		18.4	22.1	19	11.2
CD4 naive	5.9	1.15	6.95	10.1		1.88	0.49	0.64	0.92
CD4 effector	2.19	0.59	2.21	1.64		19.4	4.82	11.7	13.7
CD4 memory	14.1	1.86	15	7.65		0.73	0.16	0.22	0.17
CD8 naive	12.1	4	12.4	9.21		2.71	0.69	0.75	1.24
CD8 effector	0.25	0.63	0.3	0.39		4.92	0.81	0.87	2.66
CD8 memory	3.56	2.73	3.22	1.82		0.44	0.09	0.1	0.17
NK cells	2.76	4.81	4.19	3.43		1.05	0.85	1.34	1.11
Monocytes	0.44	1.12	0.73	0.6		2.29021	4.82063	3.00347	3.16785
Neutrophils	5.57	5.36	5.83	7.82		33.6	53.4	52	45.1

## Sheet: Fig1E
		WT					STAT1 KO
B cells	55.9625	58.7935	65.8197	62.6042		18.1193	20.2331	24.7964	32.7562
CD4 naive	0.102302	0.254102	0.345224	2.51069		0.0839228	0.06331	0.0950312	0.117505
CD4 effector	5.92668	11.5006	3.01994	6.79598		8.08456	7.11306	12.7206	11.55
CD4 memory	0.347826	3.19528	0.286132	5.97235		0.0679375	0.0297929	0.0475156	0.0760325
CD8 naive	0.0477408	0.852341	0.127515	5.16861		0.0159853	0.0186206	0.0305458	0.0207361
CD8 effector	2.36317	2.88315	2.06513	0.809709		1.27882	3.69432	2.1416	4.244
CD8 memory	0.0647911	2.64106	0.152396	2.15657		0.011989	0.0111724	0.0169699	0.0138241
NK cells	2.11464	2.59235	1.14175	0.710937		0.397171	0.221449	0.213511	0.376528
Monocytes	0.58161	1.08137	0.813376	0.783364		8.09472	5.63816	8.49041	4.22477
Neutrophils	6.34392	6.01473	1.19459	1.47715		33.9259	39.5234	28.0467	24.1265

## Sheet: Fig1F
		WT					STAT1 KO
B cells	53.1644	71.7281	60.5541	68.8646		159.994	136.371	160.928	218.484
CD4 naive	0.0971867	0.310004	0.317606	2.76176		0.741038	0.426709	0.616753	0.783757
CD4 effector	5.63035	14.0307	2.77834	7.47558		71.3867	47.9421	82.5567	77.0387
CD4 memory	0.330435	3.89824	0.263241	6.56958		0.599888	0.200804	0.308376	0.507137
CD8 naive	0.0453538	1.03986	0.117314	5.68547		0.14115	0.125503	0.198242	0.13831
CD8 effector	2.24501	3.51745	1.89992	0.890679		11.292	24.8997	13.899	28.3074
CD8 memory	0.0615516	3.22209	0.140205	2.37223		0.105863	0.0753016	0.110134	0.0922067
NK cells	2.00891	3.16267	1.05041	0.78203		3.50702	1.49257	1.38569	2.51144
Monocytes	0.55253	1.31927	0.748306	0.861701		71.4763	38.0012	55.1028	28.1792
Neutrophils	6.02673	7.33797	1.09902	1.62486		299.566	266.387	182.023	160.924

## Sheet: Fig 1G
			WT						STAT1 KO
LK	0.438671	0.533302	0.406251	0.45069	0.564969		0.443877	0.497202	0.346255	0.369753	0.264254
CMP	0.00714004	0.00993341	0.00575974	0.012985	0.0105283		0.0579804	0.138108	0.0342089	0.0406007	0.104924
GMP	0.0409264	0.0412006	0.0456155	0.035878	0.0392171		0.297042	0.275421	0.222725	0.214052	0.094604
MEP	0.368043	0.452662	0.32078	0.366626	0.482777		0.0392706	0.018193	0.0531839	0.0811713	0.0201631
LSK	0.0624201	0.0624925	0.0729007	0.0447705	0.0647356		0.12958	0.159694	0.108836	0.118119	0.0324265
HSC	0.00184022	0.00196992	0.00306906	0.00169236	0.00227005		0.00390062	0.00530628	0.00478231	0.00389405	0.00305791

## Sheet: Fig 1H
			WT						STAT1 KO
LK	0.0599511	0.106142	0.213003	0.120381	0.15561		0.44908	0.283014	0.27764	0.420449	0.316352
CMP	0.0172829	0.028782	0.0576883	0.00173488	0.0125733		0.047809	0.0406844	0.0258817	0.0150753	0.0873785
GMP	0.00536463	0.0134784	0.0216807	0.0108912	0.00652006		0.0490595	0.0449738	0.0459073	0.041879	0.018107
MEP	0.0290907	0.0454896	0.0694796	0.0721903	0.118108		0.246673	0.131325	0.124912	0.308457	0.171947
LSK	0.00359485	0.004914	0.018511	0.0289147	0.010179		0.123503	0.100563	0.13516	0.0939988	0.0337859
HSC	0.000193569	0.0001404	0.00152145	0.00115659	0.00376623		0.00721095	0.00498265	0.00559463	0.00208823	0.00242814

## Sheet: Fig 1I
		WT					STAT1 KO
LK	0.0569535	0.129494	0.195963	0.13242		1.37404	3.0268	1.83676	1.85186
CMP	0.0164188	0.035114	0.0530733	0.00190837		0.111022	0.322233	0.264042	0.172631
GMP	0.00509639	0.0164436	0.0199462	0.0119803		0.0575721	0.330661	0.29188	0.306202
MEP	0.0276361	0.0554973	0.0639212	0.0794094		1.04289	1.66258	0.852301	0.833162
LSK	0.00341511	0.00599508	0.0170301	0.0318062		0.0898806	0.832411	0.652653	0.901517
HSC	0.00018389	0.00017129	0.00139973	0.00127225		0.0332558	0.0486018	0.0323374	0.0373162
