# Supplementary material for: Tonic interferon restricts pathogenic IL-17-driven inflammatory disease via balancing the microbiome
Source: eLife journal article supplement (doi:10.7554/elife.68371), 2021-08-11
Supplement: supp [file elife-68371-supp-v1.zip › elife_poa_e68371_Figure_2_source_data_1.xlsx]

## Sheet: Fig 2A
	WT		STAT1 KO
	Mean	STD	Mean	STD
P1	42.6667	1	77.8889	2.0367
P2	19.8889	0.509175	21.5556	7.15179
P3	18.7778	7.89045	32.3333	10.8372
P4	1.22222	0.509175	6.22222	8.18083

## Sheet: Fig 2B
	WT		STAT1 KO
	Mean	STD	Mean	STD
P1	7.66667	0.666667	58.6667	8.02081
P2	8.88889	7.15179	20.6667	11.8369
P3	2	2.64575	27.8889	20.6944
P4	0.444444	0.7698	13.5556	6.33626

## Sheet: Fig 2C
			BM WT						SPL WT			BM KO									SPL KO
% CD45.2	44.3	77.6	84.7	75.1	71.8	84.3		1.48	5.2	2.5		45.9	63	65.6	18.3	92.6	33.3	81.2	90.4		42.3	84.6	89.7	86.5	90.7	79.5	71.5	92

## Sheet: Fig 2D
		BM BM WT							BM BM KO									SPL BM KO							BM SLP KO											SPL SPL KO
% CD45.2	31.7	59.1	58	74.4		6.35	0.92	0.19	1.99	0.79	1.92	1.19	0.77		0.81	0.28	0.57	1.62	1.35	6.04		40.5	45.7	63	28.7	61.5	22.3	57.7	58.1	24.9	70	64.9	30.2		1.03	3.79	1.6	1.36

## Sheet: Fig 2E
						B cells												CD4+ T cells												CD8 T cells													Myeloid
BM BM WT	72.1	76.6	66.4	57.6									7.58	8.32	11.4	13.8									13.8	7.1	9.49	10.9									4.13	5.71	10.9	15.9
BM SPL KO	59.5	49.9	53.9	51.9	46.9	46.2	57.7	49.3	62.6	72.4	63.5		20.6	26.6	23.2	15.7	19	30.1	18.5	19.6	17.2	8.55	11.5		12.6	12.2	13.4	11.1	11.8	15.5	10.6	11.7	10.8	6.6	7.96		5.05	7.37	7.28	18.6	18.7	4.68	8.77	15.9	6.17	8.95	14

## Sheet: Fig 2F
Days elapsed	WT	STAT1 KO	ARGR DKO
22	1
24	1
30	1
31	1
18	1
18	1
22	1
25	1
14		1
21		1
7		1
14		1
15		1
16		1
28		1
20			1
20			1
21			1
21			1
22			1
27			1
37			1
