# Supplementary material for: Tonic interferon restricts pathogenic IL-17-driven inflammatory disease via balancing the microbiome
Source: eLife journal article supplement (doi:10.7554/elife.68371), 2021-08-11
Supplement: supp [file elife-68371-supp-v1.zip › elife_poa_e68371_Figure_3_source_data_1.xlsx]

## Sheet: Fig 3A
					WT										ARGR DKO										STAT1 KO
IFNg	3.20595	7.54226	3.35459	0.877793	5.79632	2.59332	7.59	2.12	2.86		172.218	62.3164	84.2908	277.595	103.988	128.166	28.44	17.68	12.54		173.545	342.431	321.836	778.97	311.397	367.853	51.64	347.25	119.63
IL5	18.8749	4.05	6.47713	10.0033	3.09	7.14836					5.57273	10.4363	16.5875	56.3686	6.81344	21.4524					77.3995	42.8637	128.937	112.514	74.8619	95.9283
TNFa	0	5.24	0	0	23.3867	0					13.4623	0	16.0958	19.5834	0	7.93091					23.5421	31.9933	33.7604	36.1992	22.0832	24.2645
IL17A	18.6338	7.46	14.3803	30.5002	123.986	11.7436					41.0855	22.1022	92.9077	82.9301	126.228	46.4121					28.6753	97.369	20.2617	412.552	3190.65	4029.71

## Sheet: Fig 3B
				WT							STAT1 KO
% IFNg + CD4		3.14	1.97	1.97	0.84	4.41		52.95	38.82	9.59	32.57	9.94	39.4
IFNg+ NK cells		14.3	20.4	15.8	19.6	16.9		54.01	44.07	42.36	35.15	23.62

## Sheet: Fig 3C
	CD4 IFNg			NK IFNg
	WT	STAT1 KO		WT	STAT1 KO
	5824	6765		4337	6732
	4055	5362		4087	5153
	4299	4736		3882	4141
	4617	4934		3920	4822
	3467	4087		3775	4049

## Sheet: Fig 3D
		WT							STAT1 KO
IL17 CD4	0.147	0.56	0.56	0.28	0.263		3.11	2.4	1.39	1.9	1.74
IL17 NK	0	1.02	0	0	0.6		4.1	3.46	1.31	6.98	1.19

## Sheet: Fig 3E
	CD4 IL17			NK IL17
	WT	STAT1 KO		WT	STAT1 KO
	5283	10119		0	11497
	2571	10639		2793	10576
	2946	7734		0	9233
	0	11772		0	12816
	0	7734		0	6156
