# Supplementary material for: Tonic interferon restricts pathogenic IL-17-driven inflammatory disease via balancing the microbiome
Source: eLife journal article supplement (doi:10.7554/elife.68371), 2021-08-11
Supplement: supp [file elife-68371-supp-v1.zip › elife_poa_e68371_Figure_3_source_data_2.xlsx]

## Sheet: Figure 3-Source Data 1
Location	Sample	GCSF	IL-10	IL-3	LIF	IL1b	IL-2	MCSF	IP-10	IL-4	IL-5	IL-6	IFNa	IL-22	IL-9	IL-13	IL-27	IL-23	IFNg	IL-12p70	GMCSF	KC	RANTES	TNFa	MIP1a	MCP3	MCP1	IL-17a	IL-15	MIP2	IL1a	ENA-78	Eotaxin	IL-28	IL-18	MIP1b	IL-31	Total Events
1(1,A1)	Standard1	6962.71	10086.2	1353.67	9174.37	4393.03	5977.12	1002.32	1761.82	6466.18	9655.33	20711.5	13112.9	43480.7	64360.7	8959.25	11232.1	51377.1	4032.94	10379	7763.67	6908.38	> 12300	8241.82	2086.93	1401.34	33466.2	4777.45	6067.9	2840.34	9846.1	17015.1	2468.66	110249	147951	3985.1	20310	2992
2(1,B1)	Standard2	802.217	2099.34	331.03	2165.43	1275.33	1541.88	239.532	439.588	1196.55	2552.14	5453.87	7507.08	12698.5	14547.9	3686.56	2909.91	11287.9	1048.03	6972.79	3163.69	1660.56	2869.06	3795.04	492.122	347.952	6985.54	1328.33	1651.09	886.433	4481.71	10283.6	586.242	30791.7	39916.4	1247.1	4788.24	2542
3(1,C1)	Standard3	239.067	586.115	87.2228	534.89	309.769	386.201	58.5649	103.104	369.341	652.701	1395.84	1496.04	2585.46	4364.33	732.691	663.717	3323.95	282.418	916.379	667.051	380.21	774.898	863.119	122.765	79.4099	1963.42	322.071	421.349	217.708	1026.1	1657.2	133.165	7645.47	10204.6	329.718	1185.03	3150
4(1,D1)	Standard4	48.4772	162.109	20.7575	133.966	68.4551	93.2339	12.4367	25.8867	74.7635	143.938	311.741	264.243	652.234	989.178	151.669	153.217	772.362	60.3289	185.527	158.521	97.2018	184.196	173.089	31.175	17.4228	473.723	78.6864	97.877	42.6131	191.836	305.236	34.9246	1755.49	2232.47	82.4129	273.637	3019
5(1,E1)	Standard5	11.7692	47.3733	4.98828	34.6384	18.3729	22.6775	4.38817	7.67552	29.027	40.2846	90.6925	78.2854	178.832	234.668	44.9022	44.7329	196.696	16.7908	69.039	37.8554	25.8752	49.1203	48.1623	8.46665	5.95274	107.666	22.6428	28.8829	15.0221	52.2048	95.0463	9.4278	437.991	633.199	19.1595	83.346	2366
6(1,F1)	Standard6	3.20634	8.86087	1.27196	7.9658	4.44929	5.7883	0.923508	1.34598	4.55254	9.46004	20.6305	< 4.78515625	46.8556	61.781	11.0891	9.54389	47.3314	3.79222	13.4225	10.2454	5.36207	10.8807	11.6707	1.83167	1.06508	29.1791	4.01973	6.04282	< 0.7568359375	12.7827	22.3392	2.26754	114.765	137.397	4.88993	17.4134	3621
7(1,G1)	Standard7	0.828726	3.90346	0.329889	1.86621	1.21808	1.74533	0.909151	0.700107	6.40741	7.81435	7.14384	35.7802	14.4685	27.8031	3.95349	2.71366	11.3111	0.877793	10.2404	3.17141	4.10657	3.38812	10.9651	0.763671	0.653167	Invalid(14.1759683588709)	1.578	1.67618	5.27672	3.97331	27.3254	0.85253	23.6036	51.287	1.31021	5.07599	3289
8(1,H1)	Background0	NaN	NaN	NaN	NaN	NaN	NaN	NaN	NaN	NaN	NaN	NaN	NaN	NaN	NaN	NaN	NaN	NaN	NaN	NaN	NaN	NaN	NaN	NaN	NaN	NaN	NaN	NaN	NaN	NaN	NaN	NaN	NaN	NaN	NaN	NaN	NaN	2980
9(1,A2)	Standard1	2846.66	10891.1	1344.65	8624.62	4814.49	5509.05	950.89	1743.1	6663.82	10044.1	20603	12108.4	50802.8	73786.3	8755.43	9328.89	58796.6	4198.37	12706.1	8272.81	5745.17	> 12300	11009.8	1900.06	1240.57	33582.8	5261.77	6443.26	2828.55	10925.9	15022.7	2332.39	111234	141926	3853.57	18676.3	3208
10(1,B2)	Standard2	846.795	2036.52	343.64	2363.83	1242.59	1669.71	229.457	453.63	1230.2	2493.16	6065.42	8650.92	12160.8	16370.2	4026.37	2888.79	13637.8	1187.28	8535.56	3106.84	1645.7	3115.65	4185.67	524.772	365.882	8017.92	1260.59	1745.61	878.496	4097.14	12301.4	699.268	32526	42189.3	2008.61	4960.74	2429
11(1,C2)	Standard3	226.919	543.728	85.2601	581.969	305.142	381.646	48.7289	113.934	294.194	623.172	1401.95	1608.22	2925.06	4746.52	667.213	706.538	3360.89	279.075	1079.78	668.056	408.622	807.016	888.685	119.416	75.1611	2072.39	301.036	403.115	192.866	917.441	1485.12	161.468	7791.69	9949.02	353.965	1380.13	2983
12(1,D2)	Standard4	48.146	139.266	18.8398	133.26	70.6659	84.5434	12.8853	24.7551	76.4654	141.975	285.861	261.833	816.084	1019.44	151.309	169.226	771.475	58.2817	201.512	148.916	94.6422	175.025	189.533	29.2362	18.5419	481.65	70.6247	88.793	43.5581	183.668	307.348	34.0747	1640.41	2183.66	79.3597	293.022	2432
13(1,E2)	Standard5	20.274	55.5928	9.15727	53.3324	25.9379	32.287	4.34287	10.0507	26.2461	56.2704	111.828	97.9562	265.277	327.515	55.0504	64.3597	275.388	22.9263	85.262	55.4639	32.777	64.975	64.2663	11.5409	6.91044	172.928	26.0943	36.3468	16.6148	66.0429	113.032	14.4765	615.789	795.29	31.4868	109.138	2685
14(1,F2)	Standard6	3.54429	3.90346	1.27196	8.51455	4.57798	5.59706	0.696093	1.96211	4.40655	8.6952	19.5426	< 4.78515625	40.7291	69.1072	9.60913	10.6413	50.8682	4.21969	15.7301	9.80655	6.54832	11.6366	13.1596	1.70963	1.56199	32.4949	5.04603	5.27136	4.34527	13.3282	22.0122	2.26754	111.852	147.836	5.52359	17.4134	3019
15(1,G2)	Standard7	0.828726	6.5071	0.329889	3.73146	1.15629	1.31453	< 0.2197265625	0.344814	< 1.30615234375	1.77741	4.43591	18.6209	9.91172	8.28932	1.86088	2.71366	15.0746	1.30062	< 3.80859375	2.17784	1.17564	2.84293	2.76456	0.418064	0.216072	Invalid(4.20271778928888)	1.09993	1.84162	Invalid(2.61766149852811)	2.79085	< 5.712890625	0.50143	35.7257	31.0825	1.31021	5.07599	2858
16(1,H2)	Background0	NaN	NaN	NaN	NaN	NaN	NaN	NaN	NaN	NaN	NaN	NaN	NaN	NaN	NaN	NaN	NaN	NaN	NaN	NaN	NaN	NaN	NaN	NaN	NaN	NaN	NaN	NaN	NaN	NaN	NaN	NaN	NaN	NaN	NaN	NaN	NaN	2623
17(1,A3)	WT 44510	9.09179	15.2381	3.3446	219.34	15.2182	12.4799	0.798238	156.968	39.9548	18.8749	20.6305	69.1973	138.764	893.498	77.9728	247.931	155.289	3.20595	< 3.80859375	11.011	21.1805	214.154	< 3.125	26.0792	133.481	34.9331	18.6338	15.1571	31.797	13.7094	118.382	907.036	201.172	669.244	2.80754	162.994	2512
18(1,B3)	WT 44511	15.6093	51.5049	38.4803	296.553	463.172	8.85452	4.91269	483.046	109.589	38.5945	1496.5	499.817	592.128	26757.2	649.253	868.55	550.801	7.54226	< 3.80859375	38.408	21.6166	843.532	2218.5	193.181	110.743	2264.67	1440.82	277.404	108.169	15.529	336.003	719.747	528.766	2445.21	5.02041	430.969	2701
19(1,C3)	WT 44513	8.75668	15.2381	6.39849	0.731249	2.11526	6.68408	< 0.2197265625	96.4807	2.35866	6.47713	19.5426	28.723	88.1817	310.873	64.0966	27.453	47.3314	3.35459	< 3.80859375	2.89788	19.4145	84.4177	< 3.125	10.7631	44.6123	87.3895	14.3803	9.65476	22.7718	7.09843	78.5697	510.379	185.472	459.955	3.16227	21.5492	2404
20(1,D3)	WT 44514	5.56683	< 2.2705078125	1.77292	< 2.18505859375	4.363	6.5205	0.654765	35.9873	4.90728	10.0033	40.1258	40.0749	38.2495	187.079	24.471	11.375	10.3058	0.877793	< 3.80859375	3.43013	9.84281	33.4987	< 3.125	1.53786	63.369	18.1734	30.5002	15.7898	66.7516	< 3.3203125	37.623	445.809	152.15	292.726	1.58875	50.4301	3188
21(1,E3)	WT 44879	10.0965	101.005	23.3454	4.84179	120.994	1.15325	0.887443	147.8	14.4102	234.46	27.0325	110.67	314.278	192.483	26.2186	17.2961	140.946	5.79632	< 3.80859375	5.11156	18.5174	56.0436	23.3867	4.04592	123.672	121.024	123.986	50.9802	32.7964	6.18083	38.4951	849.857	363.732	459.955	4.20299	73.9783	3049
22(1,F3)	WT44 881	13.6069	18.2093	3.95391	7.78273	2.86527	20.0547	< 0.2197265625	70.11	< 1.30615234375	7.14836	11.8401	< 4.78515625	87.0222	91.358	7.53794	42.4066	51.5723	2.59332	< 3.80859375	4.2873	21.1805	29.4543	< 3.125	1.26987	65.5257	26.2079	11.7436	10.7953	13.8996	7.09843	46.468	914.295	150.899	192.003	3.21902	25.5082	3269
23(1,G3)	ARGR 45205	15.9429	218.757	19.5566	22.9948	3.92503	7.33274	0.217807	16.0553	14.1584	5.57273	17.3425	< 4.78515625	111.25	142.774	19.5648	16.9236	111.743	172.218	< 3.80859375	1.94082	5.96246	34.0004	13.4623	1.25342	81.1747	< 30.46875	41.0855	35.4267	Invalid(23.7504207111)	8.3612	24.7759	942.336	297.246	267.368	1.67488	35.2217	3050
24(1,H3)	ARGR 46068	11.1004	19.1782	5.12779	12.522	3.38274	6.91674	< 0.2197265625	31.9146	5.51597	10.4363	39.7857	< 4.78515625	178.832	123.39	10.9044	47.0656	34.2796	62.3164	< 3.80859375	3.17141	54.4057	25.6918	< 3.125	0.870537	55.0426	0.367896	22.1022	13.2283	25.883	9.18868	92.372	1118.51	136.784	298.106	3.21902	26.2825	3190
25(1,A4)	ARGR 45691	16.2763	78.6644	10.0468	2.80167	6.97309	8.69724	0.959025	277.843	11.9395	16.5875	88.0183	< 4.78515625	262.956	28079	350.111	739.219	75.7643	84.2908	< 3.80859375	6.88475	158.59	519.662	16.0958	128.211	42.0117	27.9144	92.9077	52.6512	31.744	5.02816	32.4524	975.52	290.478	1243.01	4.29833	60.8564	2782
26(1,B4)	ARGR 45208	42.8454	525.366	79.1316	5.57942	11.3348	5.88355	0.901939	47.9552	6.95455	56.3686	103.59	< 4.78515625	1315.16	270.714	41.9417	40.473	1079.73	277.595	< 3.80859375	5.24081	16.6915	59.5084	19.5834	2.76013	136.085	21.8257	82.9301	180.185	27.7104	4.58036	81.9242	1556.24	867.811	301.683	3.60046	41.2451	2958
27(1,C4)	ARGR 45690	9.25931	110.86	7.83876	1.86621	13.0898	3.51006	1.19616	118.165	5.90502	6.81344	69.3279	< 4.78515625	122.727	298.021	45.8895	18.0419	79.8569	103.988	< 3.80859375	10.8434	33.5666	69.0028	< 3.125	7.85447	38.2354	1.72695	126.228	49.1264	35.5724	12.3838	61.0536	573.279	450.262	431.441	2.42259	86.0232	2793
28(1,D4)	ARGR 45692	14.4415	101.005	6.39849	2.05387	5.2508	1.92279	< 0.2197265625	19.7812	5.2496	21.4524	25.9779	< 4.78515625	138.764	161.684	24.9721	24.8025	29.7605	128.166	< 3.80859375	5.17644	146.009	37.8197	7.93091	2.07993	49.9236	51.4996	46.4121	18.8901	35.3698	< 3.3203125	22.6605	1094.69	187.747	1207.36	3.04687	35.9419	2596
29(1,E4)	STAT1 45940	42.1827	85.6596	9.60104	2.98802	7.20576	19.5535	< 0.2197265625	30.3597	< 1.30615234375	77.3995	40.8053	< 4.78515625	314.278	165.336	28.0002	38.544	193.913	173.545	< 3.80859375	4.21412	16.6915	22.5673	23.5421	0.637305	78.5263	11.3186	28.6753	19.9032	11.1697	2.95014	36.9437	586.989	191.14	502.276	1.91814	16.5598	2238
30(1,F4)	STAT1 46010	33.7288	126.623	19.876	16.5072	9.75234	9.01145	0.704204	64.0327	9.88518	42.8637	136.546	< 4.78515625	315.451	234.668	45.9618	81.1598	178.667	342.431	< 3.80859375	7.41627	31.9832	770.448	31.9933	6.72067	115.203	24.0391	97.369	74.7382	79.3667	12.5443	37.2843	293.902	444.134	511.341	5.06346	49.7633	2731
31(1,G4)	STAT1 45720	15.9429	73.1771	10.6443	28.0196	10.2604	8.38157	2.34358	48.334	12.4549	128.937	650.636	78.7712	447.497	270.714	65.3294	28.5922	147.085	321.836	< 3.80859375	4.64195	798.325	149.383	33.7604	7.3728	247.089	56.4515	20.2617	97.2053	40.5088	34.658	54.592	254.049	490.188	2412.82	2.35474	62.7661	2912
32(1,H4)	STAT1 45051	127.757	1134.62	85.9461	15.0602	16.0309	27.9405	0.369993	37.7656	5.31677	112.514	626.205	28.8924	1467.78	159.854	21.7869	61.9826	2106.65	778.97	< 3.80859375	9.67279	23.7678	437.628	36.1992	3.08311	154.497	73.9036	412.552	240.609	32.272	15.104	67.5613	1293.31	1560.09	581.566	5.76526	96.5655	3511
33(1,A5)	STAT145944	17.6097	15.2381	2.02843	12.1588	3.56579	8.08706	< 0.2197265625	25.5631	7.07393	74.8619	32.251	19.5381	73.0398	202.819	44.3726	16.5514	15.0746	311.397	< 3.80859375	7.04667	5.36207	30.9778	22.0832	1.3944	163.801	19.5607	3190.65	25.6252	18.0511	< 3.3203125	54.247	227.1	319.181	370.09	2.80754	68.422	2355
34(1,B5)	STAT1 45082	25.0966	7.70599	3.3446	16.1456	3.47457	7.92789	< 0.2197265625	39.8403	7.83367	95.9283	33.6298	< 4.78515625	90.4985	211.344	54.8804	30.4953	20.2504	367.853	< 3.80859375	8.22359	7.12159	52.714	24.2645	2.97795	232.619	20.0182	4029.71	29.1675	33.8351	< 3.3203125	64.0682	463.467	365.559	444.053	3.27515	69.0441	3300
