# Supplementary material for: Tonic interferon restricts pathogenic IL-17-driven inflammatory disease via balancing the microbiome
Source: eLife journal article supplement (doi:10.7554/elife.68371), 2021-08-11
Supplement: supp [file elife-68371-supp-v1.zip › elife_poa_e68371_Figure_4_figure_supplement_1.pdf]

Figure 4-supplement figure 1

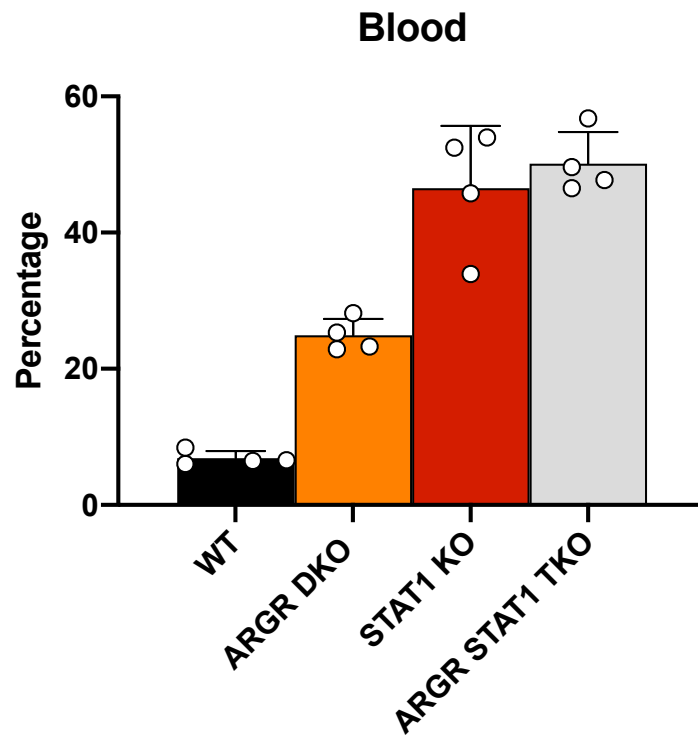

**Figure 4-supplement figure 1:** Flow cytometric analysis of myeloid cells in WT, STAT1 KO, ARGR DKO and ARGR STAT1 TKO animals
