# Supplementary material for: Tonic interferon restricts pathogenic IL-17-driven inflammatory disease via balancing the microbiome
Source: eLife journal article supplement (doi:10.7554/elife.68371), 2021-08-11
Supplement: supp [file elife-68371-supp-v1.zip › elife_poa_e68371_Figure_4_source_data_1.xlsx]

## Sheet: Fig 4A
				WT								STAT1 KO									STAT2 KO							ARGR DKO										GR STAT2 DKO
WBC	12.93	10.14	11.51	9.21	7.91	8.76		252.61	132.95	210.66	152.98	198.34	100.67	103.99	242.55	145.8	142.48		81.42	88.48	98.66	101.72	85.74		13.95	22.1	21.88	18.43	20.03	20.17	15.53	13.6	17.98	19.56		186.15	196.16	91.69	175.59	251.98
Neutrophils	1.75	1.02	1.3	1.56	1.07	1.37		136.46	59.64	92.21	46.42	100.9	46.67	45.8	120.74	73.04	70.51		53.27	59.12	54.36	63.48	56.86		4.41	3.69	2.91	2.67	4.07	2.52	2.21	2.54	3.11	2.45		64.65	72.38	14.81	53.3	94.13
Monocytes	0.15	0.13	0.22	0.23	0.16	0.24		13.53	7.09	14.31	5.44	9.73	5.75	5.01	6.91	6.19	5.98		4.99	8.38	5.99	6.84	4.63		1.07	0.84	0.62	0.78	0.63	0.48	0.37	0.52	0.44	0.54		11.69	11.02	3.4	11.83	13.36

## Sheet: Fig 4B
			WT					STAT1 KO				STAT2 KO					ARGR DKO					GRSTAT2 DKO
B cells	48.3	68.8	41.4	49.8		18.4	22.1	19	11.2		2.79818	3.71094	2.74676	1.8388		10.2925	21.4293	38.2258	31.8516		1.7258	2.58806	1.10958	1.4393
CD4 naive	5.9	1.15	6.95	10.1		1.88	0.49	0.64	0.92		0.365433	1.09408	0.350281	0.0837404		3.38651	1.80978	3.21505	1.06499		0.0328933	0.0438654	0.360561	0.00215787
CD4 effector	2.19	0.59	2.21	1.64		19.4	4.82	11.7	13.7		12.7693	4.05049	3.45426	1.05722		3.73985	1.95911	1.03584	1.90462		8.01281	11.1528	17.6761	13.7974
CD4 memory	14.1	1.86	15	7.65		0.73	0.16	0.22	0.17		0.0800473	0.0960318	0.0624263	0.038381		0.370837	0.135111	0.523297	0.218087		0.208324	0.208361	0.476456	0.0712097
CD8 naive	12.1	4	12.4	9.21		2.71	0.69	0.75	1.24		0.0556851	0.195493	0.027745	0.00348918		0.174923	0.184889	1.24014	0.119948		0.0109644	0.00438654	0.240374	0.00863148
CD8 effector	0.25	0.63	0.3	0.39		4.92	0.81	0.87	2.66		1.35384	0.833419	0.343345	0.355897		0.556255	0.760889	0.304659	0.890521		1.05039	2.85125	5.55007	4.25316
CD8 memory	3.56	2.73	3.22	1.82		0.44	0.09	0.1	0.17		0.0174016	0.024008	0.0208088	0.00697837		0.0314861	0.0213333	0.283154	0.0399826		0.0285075	0.0350923	0.150234	0.0409995
NK cells	2.76	4.81	4.19	3.43		1.05	0.85	1.34	1.11		0.346178	0.375391	0.366774	0.273574		0.0623874	0.0991607	0.137906	0.123564		0.221812	0.257753	0.0996321	1.61501
Monocytes	0.44	1.12	0.73	0.6		2.29021	4.82063	3.00347	3.16785		4.46884	5.22072	4.56197	7.76665		3.48329	2.74463	2.19924	2.13694		3.4763	6.69357	3.4967	4.98582
Neutrophils	5.57	5.36	5.83	7.82		33.6	53.4	52	45.1		44.8388	47.5634	52.0819	54.3665		21.8425	25.4099	20.6895	21.1622		66.2864	49.0629	34.6911	49.5324

## Sheet: Fig 4C
			WT					STAT1 KO				STAT2 KO					ARGR DKO					GRSTAT2 DKO
B cells	53.1644	71.7281	60.5541	68.8646		159.994	136.371	160.928	218.484		101.992	55.5479	67.5223	32.5147		94.9749	40.2766	32.2915	32.0162		23.8698	55.0769	36.2645	60.7338
CD4 naive	0.0971867	0.310004	0.317606	2.76176		0.741038	0.426709	0.616753	0.783757		1.59555	0.322953	1.93431	1.4015		5.84964	1.54993	3.17313	3.0627		0.132365	1.1035	0.923251	0.163791
CD4 effector	5.63035	14.0307	2.77834	7.47558		71.3867	47.9421	82.5567	77.0387		145.236	27.797	60.5588	32.76		3.11458	1.30911	1.26098	1.55919		18.156	34.8216	33.441	33.8229
CD4 memory	0.330435	3.89824	0.263241	6.56958		0.599888	0.200804	0.308376	0.507137		1.59555	0.461361	1.30938	0.595636		0.883336	0.314927	0.510594	0.489446		0.496368	2.74649	2.71608	1.03189
CD8 naive	0.0453538	1.03986	0.117314	5.68547		0.14115	0.125503	0.198242	0.13831		0.163646	0.11534	0.327345	0.0700748		0.955311	0.296401	0.735917	0.175849		0.319882	0.784712	2.15783	0.687924
CD8 effector	2.24501	3.51745	1.89992	0.890679		11.292	24.8997	13.899	28.3074		20.3739	11.188	18.123	9.42507		0.0916052	0.0432252	0.0413437	0.0175849		1.65456	5.14967	5.96893	4.97926
CD8 memory	0.0615516	3.22209	0.140205	2.37223		0.105863	0.0753016	0.110134	0.0922067		0.081823	0	0.178552	0.0700748		0.00654323	0	0.0103359	0.00879244		0.121334	0.318789	0.837368	0.278445
NK cells	2.00891	3.16267	1.05041	0.78203		3.50702	1.49257	1.38569	2.51144		2.28795	0.99788	1.44265	1.59528		0.0616124	0.0511483	0.0417689	0.0526976		0.510848	0.626666	0.140848	0.234873
Monocytes	0.55253	1.31927	0.748306	0.861701		71.4763	38.0012	55.1028	28.1792		49.2758	13.2645	6.75281	69.0422		6.25708	1.53764	0.589162	1.08805		102.313	188.081	72.283	156.066
Neutrophils	6.02673	7.33797	1.09902	1.62486		299.566	266.387	182.023	160.924		260.7	122.618	99.2664	342.057		21.6465	6.90821	2.51933	4.13521		142.276	308.118	109.354	240.897

## Sheet: Fig 4D
			WT					STAT1 KO							STAT2 KO				ARGR DKO					GRSTAT2 DKO
LK	0.438671	0.533302	0.406251	0.45069	0.564969		0.443877	0.497202	0.346255	0.369753	0.264254		0.357232	0.392354	0.327379	0.221901		0.549647	0.385764	0.267756	0.502486		0.168987	0.356045	0.354825	0.288143
CMP	0.00714004	0.00993341	0.00575974	0.012985	0.0105283		0.0579804	0.138108	0.0342089	0.0406007	0.104924		0.0449428	0.0657472	0.052561	0.0352382		0.0378741	0.0799028	0.055016	0.100309		0.0236046	0.0497528	0.0158583	0.0210846
GMP	0.0409264	0.0412006	0.0456155	0.035878	0.0392171		0.297042	0.275421	0.222725	0.214052	0.094604		0.194741	0.162388	0.186361	0.116249		0.320809	0.162237	0.117068	0.180584		0.0514069	0.0518048	0.0669386	0.092127
MEP	0.368043	0.452662	0.32078	0.366626	0.482777		0.0392706	0.018193	0.0531839	0.0811713	0.0201631		0.0971864	0.124845	0.0645261	0.0559647		0.142706	0.10405	0.0599755	0.170786		0.06708	0.217299	0.242749	0.140787
LSK	0.0624201	0.0624925	0.0729007	0.0447705	0.0647356		0.12958	0.159694	0.108836	0.118119	0.0324265		0.141895	0.0988449	0.0949137	0.172524		0.05923	0.0908863	0.0801019	0.0905825		0.12665	0.189903	0.151004	0.1317
HSC	0.00184022	0.00196992	0.00306906	0.00169236	0.00227005		0.00390062	0.00530628	0.00478231	0.00389405	0.00305791		0.00683185	0.00358621	0.00246899	0.00229949		0.0068433	0.00871972	0.0100344	0.00704047		0.0130363	0.0298445	0.0231364	0.0146727

## Sheet: Fig 4E
			WT					STAT1 KO				STAT2 KO						ARGR DKO				GRSTAT2 DKO
LK	0.0569535	0.129494	0.195963	0.13242		1.37404	3.0268	1.83676	1.85186		4.83404	3.96519	3.24709	6.8349		0.494018	0.346233	0.0719699	0.409777		4.04401	11.9886	6.71166	6.21637
CMP	0.0569535	0.035114	0.0530733	0.00190837		0.111022	0.322233	0.264042	0.172631		0.323671	0.409466	0.516692	0.332151		0.0810653	0.0681084	0.00999998	0.0604914		0.517633	2.03806	0.567806	0.658936
GMP	0.0164188	0.0164436	0.0199462	0.0119803		0.0575721	0.330661	0.29188	0.306202		0.234087	0.42804	0.410912	0.150527		0.0602461	0.0406784	0.010798	0.038067		0.386203	1.01304	0.431559	0.516581
MEP	0.00509639	0.0554973	0.0639212	0.0794094		1.04289	1.66258	0.852301	0.833162		3.67217	2.4981	1.8923	5.8229		0.280335	0.192943	0.0406732	0.258945		2.78632	7.94844	5.32234	4.34525
LSK	0.0276361	0.00599508	0.0170301	0.0318062		0.0898806	0.832411	0.652653	0.901517		1.2869	1.29105	1.27055	1.47119		0.0761083	0.025564	0.00406483	0.0275726		0.848742	1.99056	0.55862	1.11786
HSC	0.00341511	0.00017129	0.00139973	0.00127225		0.0332558	0.0486018	0.0323374	0.0373162		0.0112954	0.0069307	0.00837619	0.00496242		0.00770234	0.0003732	0.00022444	0.00217809		0.123916	0.35631	0.0765309	0.167679

## Sheet: Fig 4F
				WT								GR STAT2 DKO
CD4 IFNg		2.83	4.17	5.16	2.17				41.16	52.09	47.53	36.43	62.64	38.03
NK IFNg	20.2	17.72	23.39	14.74	23.9				52.67	35.31	37.2	51.59	49.57

## Sheet: Fig 4G
			WT									GR STAT2 DKO
CD4+ IL17+	1.96	1.36	1.21	0.517	0.29				2.84	2.35	6.1	4.11	2.65	2.7
NK IL17	0.12	0.46	0.84	0.78	0.54				4.63	3.88	3.16	2.66	3.31	3.6
