# Supplementary material for: Tonic interferon restricts pathogenic IL-17-driven inflammatory disease via balancing the microbiome
Source: eLife journal article supplement (doi:10.7554/elife.68371), 2021-08-11
Supplement: supp [file elife-68371-supp-v1.zip › elife_poa_e68371_Figure_6_figure_supplement_1.pdf]

Figure 6-figure supplement 1

A

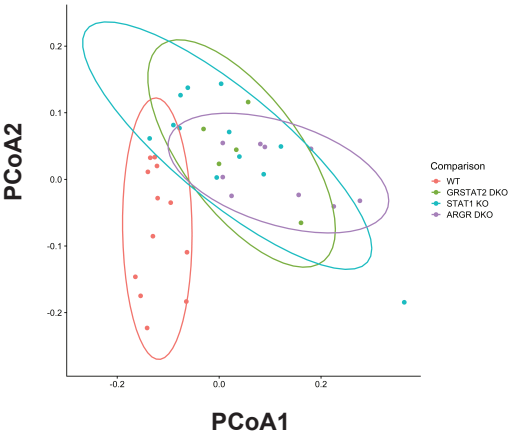

B

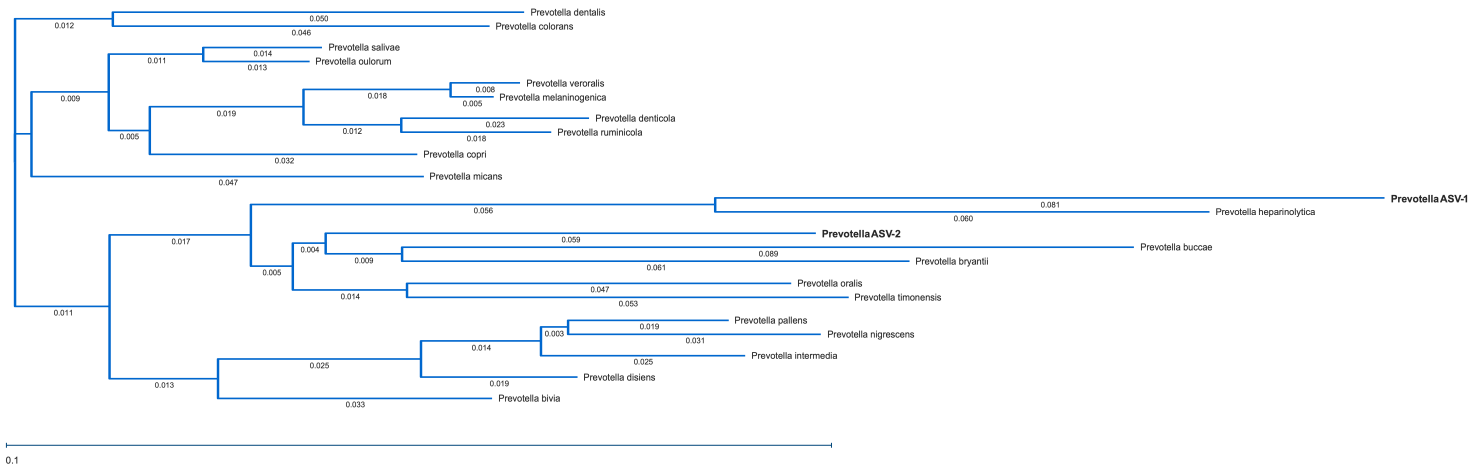

**Figure 6-figure supplement 1: Bioinformatic analysis of beta diversity and phylogeny of *Prevotella* species**  
A- Principal component analysis  
B- Phylogenetic tree of *Prevotella* species
