# Supplementary material for: Tonic interferon restricts pathogenic IL-17-driven inflammatory disease via balancing the microbiome
Source: eLife journal article supplement (doi:10.7554/elife.68371), 2021-08-11
Supplement: supp [file elife-68371-supp-v1.zip › elife_poa_e68371_Figure_6_figure_supplement_2.pdf]

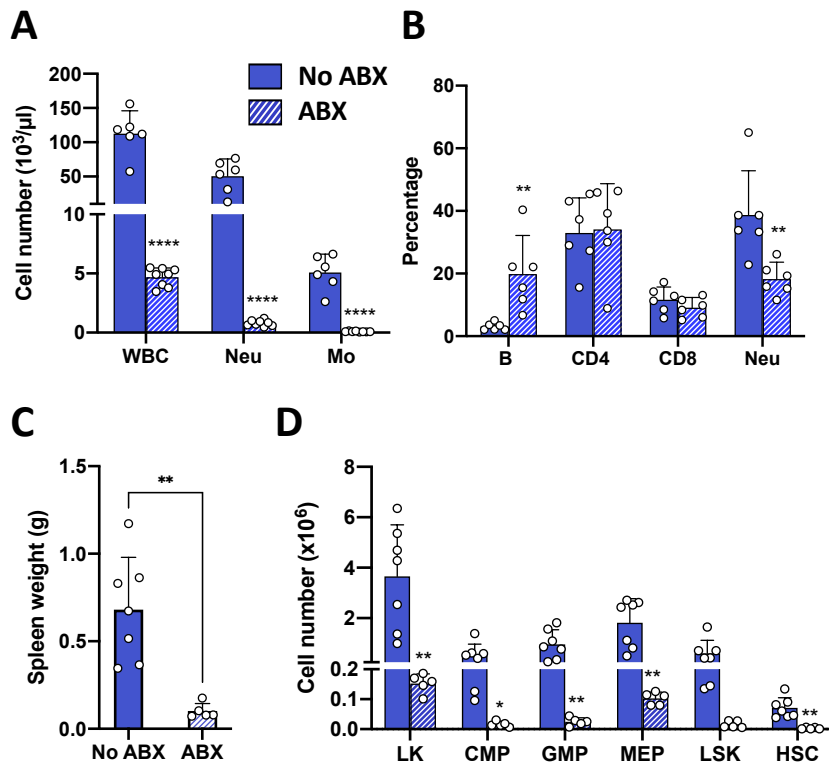

**Figure 6-figure supplement 2: Antibiotic treatment of GR STAT2 DKO mice**

A- Total WBC, neutrophil, and monocyte counts of GR STAT2 DKO mice untreated (No ABX, n=6) or treated with antibiotics (ABX, n=8).

B- Flow cytometric quantification of leukocyte subsets in peripheral blood of untreated and antibiotic-treated GR STAT2 DKO mice (n=6).

C- Spleen weights of untreated and antibiotic-treated GR STAT2 DKO mice (n=5-7).

D- Flow cytometric analysis of splenic progenitors of of untreated and antibiotic-treated GR STAT2 DKO mice (n=5-7).

\*p<0.05, \*\* p< 0.01, \*\*\*\* p<0.0001 by student's t-test. LK, lin-Sca1-c-Kit<sup>+</sup>; CMP, common myeloid progenitor; GMP, granulocyte-macrophage progenitor; MEP, megakaryocyte-erythroid progenitor; LSK, lin-Sca1+c-Kit<sup>+</sup>; HSC, hematopoietic stem cells.
