# Supplementary material for: Tonic interferon restricts pathogenic IL-17-driven inflammatory disease via balancing the microbiome
Source: eLife journal article supplement (doi:10.7554/elife.68371), 2021-08-11
Supplement: supp [file elife-68371-supp-v1.zip › elife_poa_e68371_Figure_7_figure_supplement_1.pdf]

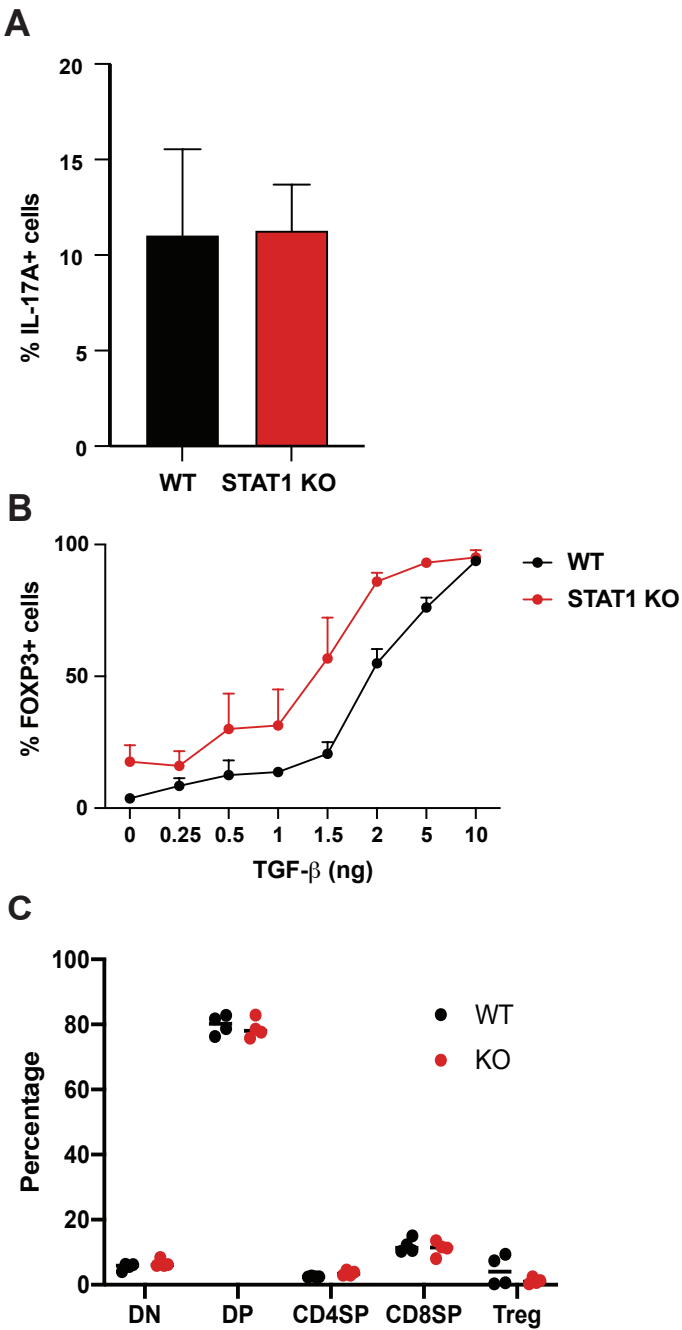

**Figure 7-figure supplement 1: Analysis of STAT1 KO and WT TH17 and Treg cells.**

- A- *In vitro* TH17 differentiation in response to IL-6 and TGF- $\beta$  of WT and STAT1 KO T cells (n=3 mice)
- B- *In vitro* Treg differentiation in response to TGF- of WT and STAT1 KO T cells (n=3 mice)
- C- Quantification of thymic T cell populations in WT and STAT1 KO mice (n=4 mice)
