# Supplementary material for: Tonic interferon restricts pathogenic IL-17-driven inflammatory disease via balancing the microbiome
Source: eLife journal article supplement (doi:10.7554/elife.68371), 2021-08-11
Supplement: supp [file elife-68371-supp-v1.zip › elife_poa_e68371_Figure_7_figure_supplement_2.pdf]

Figure 7-figure supplement 2

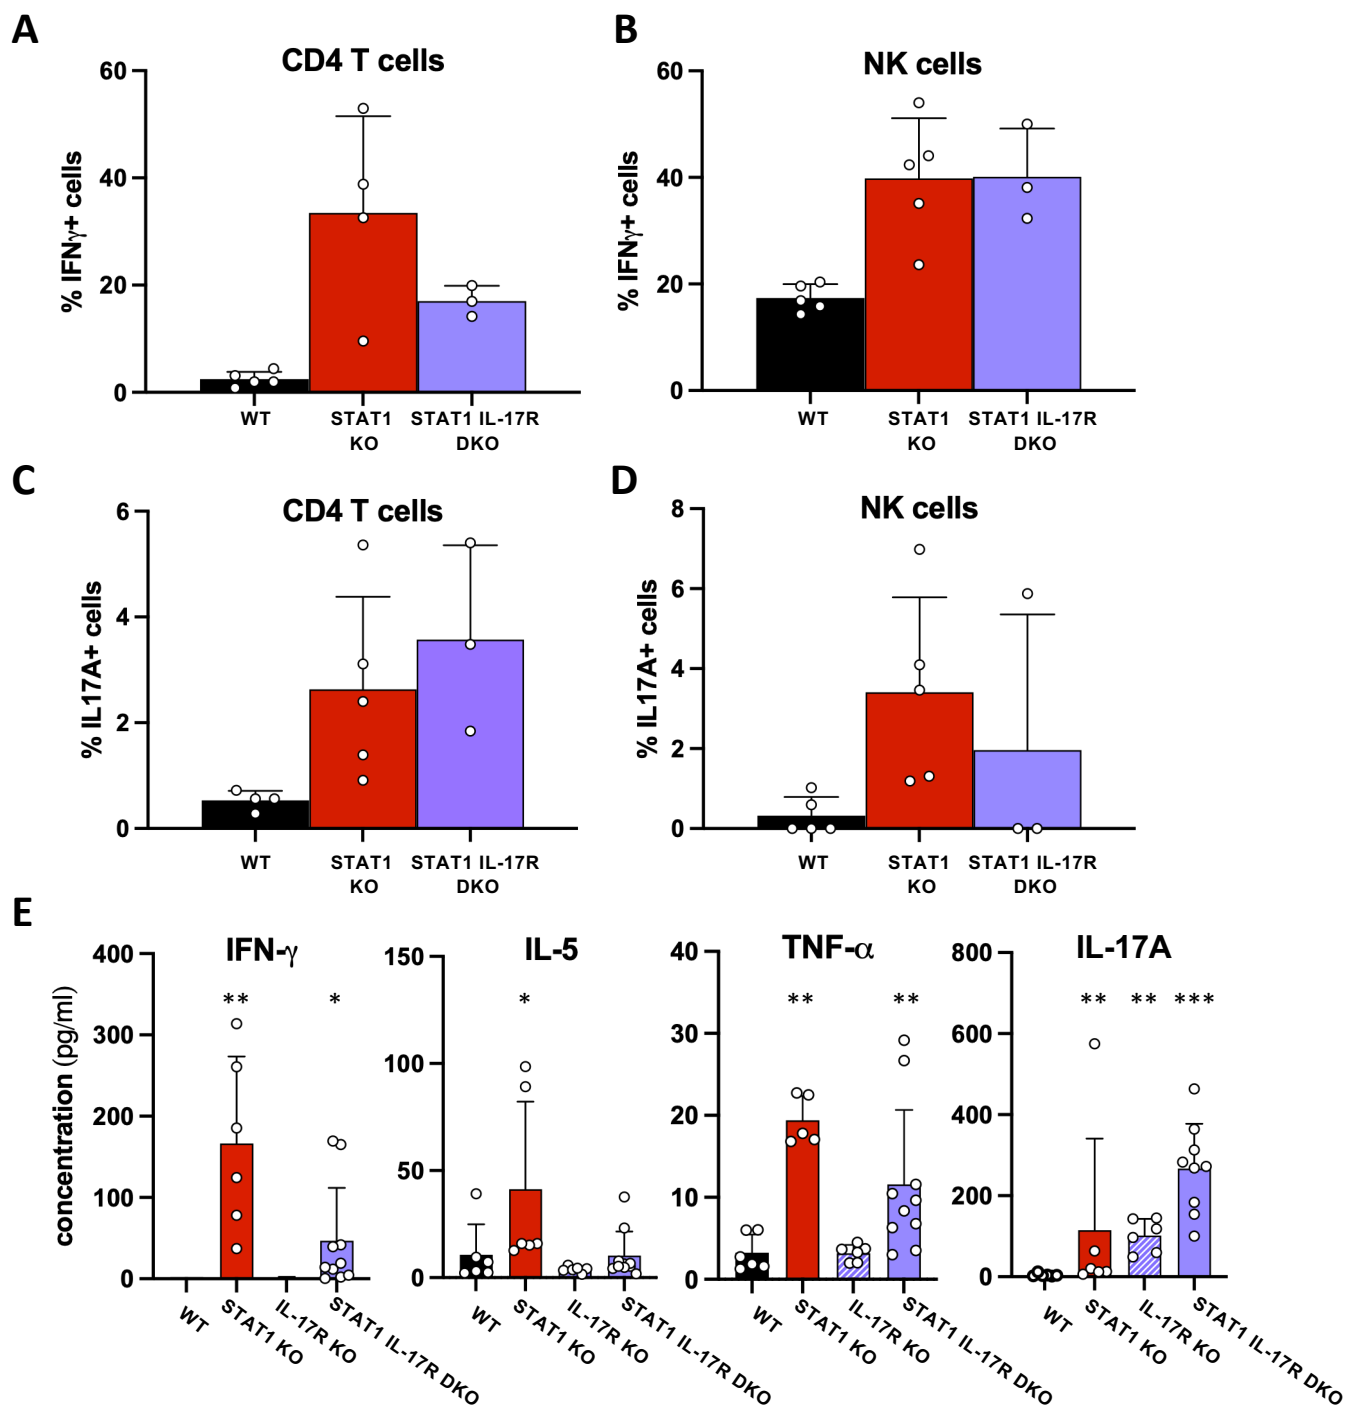

**Figure 7-figure supplement 2: Cytokine production by STAT1 IL-17R DKO lymphocytes**

Percentage of IFN- $\gamma$ - (A) or IL-17A-producing (C) CD4+ T cells or NK cells (B and D) in WT, STAT1 KO and IL-17Ra STAT1 DKO mice (n=4 or 5).

(E) Concentration of IFN- $\gamma$ , IL-5, TNF- $\alpha$ , and IL-17A in WT, STAT1 KO, IL-17R KO, and STAT1 IL-17R DKO blood (n=5-10).

\*p<0.05, \*\* p< 0.01, \*\*\* p< 0.001 by Mann-Whitney.
