# Supplementary material for: Tonic interferon restricts pathogenic IL-17-driven inflammatory disease via balancing the microbiome
Source: eLife journal article supplement (doi:10.7554/elife.68371), 2021-08-11
Supplement: supp [file elife-68371-supp-v1.zip › elife_poa_e68371_Figure_7_figure_supplement_2_source_data_1.xlsx]

## Sheet: Fig. 7-fig supp 2-Source Data 1
		DataType:	Result pg/mL
	Sample ID	Location	Sample	G-CSF	IL-10	IL-3	LIF	IL1b	IL-2	M-CSF	CXCL10	IL-4	IL-5	IL-6	IFNa	IL-22	IL-9	IL-13	IL-27	IL-23	IFNg	IL-12p70	GM-CSF	CXCL1	CCL5	TNFa	CCL3	CCL7	CCL2	IL-17A	IL-15	CXCL2	IL1a	CXCL5	CCL11	IL-28	IL-18	CCL4	IL-31	IFNb
WT	58532	33(3,A5)	Unknown202	0.999742	1.27718	< 0.37841796875	< 1.66015625	0.406828	24.6733	< 0.18310546875	7.31683	0.723479	7.31838	2.223	< 3.515625	13.7098	< 21.337890625	0.000150449	5.21756	12.5388	< 2.18505859375	2.73059	2.60537	3.92423	11.4866	1.59704	< 0.59814453125	41.5391	< 9.619140625	1.51268	0.42887	5.21001	3.12196	23.3731	54.7008	7.58274	< 35.5712890625	0.431789	< 10.0830078125	3.41372
	58355	34(3,B5)	Unknown203	2.75018	8.46873	0.120756	3.43713	0.400529	43.1497	0.219608	8.97744	0.605394	9.55042	3.0314	< 3.515625	20.0702	167.526	22.039	20.6692	15.9046	< 2.18505859375	21.3719	36.5876	15.8215	40.3141	2.73941	3.3227	56.3665	< 9.619140625	4.12482	0.706317	5.96871	7.26029	2823.58	99.5075	20.9978	1092.79	7.69915	167.486	10.6153
	58135	35(3,C5)	Unknown204	0.181102	1.94597	< 0.37841796875	56.3288	0.416264	38.0146	0.167174	26.958	0.624755	2.42871	1.21293	< 3.515625	33.9903	OOR	337.866	83.8976	8.31461	< 2.18505859375	4.18139	8.263	10.087	185.576	1.85658	39.2608	48.3458	< 9.619140625	2.13861	< 2.07763671875	3.34088	6.13573	796.309	92.0006	< 31.8359375	142.283	1.63053	< 10.0830078125	3.90705
	58136	36(3,D5)	Unknown205	0.572294	17.7209	0.19954	< 1.66015625	0.292297	38.0785	0.0765407	6.29765	0.621519	2.20631	6.09247	< 3.515625	26.6907	< 21.337890625	1.36703	4.27226	8.31461	< 2.18505859375	9.60838	8.96976	< 2.490234375	24.6857	1.28795	0.0941608	47.8742	< 9.619140625	3.02295	0.66235	2.69913	6.60272	1083.58	90.6852	29.7479	345.517	2.20854	< 10.0830078125	4.44429
	58137	37(3,E5)	Unknown206	1.35831	0.595995	0.00854223	0.528164	1.47687	36.8645	0.223049	6.35605	0.663867	3.10974	2.48409	< 3.515625	15.6546	< 21.337890625	2.15601	4.03344	20.3021	< 2.18505859375	6.50414	14.6209	13.8108	17.0367	6.03872	0.0774614	36.5647	14.5472	3.82234	0.573605	4.41957	7.36564	1406.77	73.4108	23.2974	440.358	1.46245	50.5679	5.49073
	58138	38(3,F5)	Unknown207	9.81529	3.48324	0.16359	< 1.66015625	2.76173	26.0847	1.12235	11.1175	0.852841	39.1422	1.68295	< 3.515625	173.05	< 21.337890625	1.82416	8.89132	168.889	< 2.18505859375	3.85994	3.40476	32.8775	51.8757	5.99775	2.98985	63.5973	17.042	12.1098	2.13945	4.93175	12.7161	1250.53	147.495	59.3207	222.435	0.475037	< 10.0830078125	4.78627
S1KO	58915	39(3,G5)	Unknown208	25.996	3.40506	0.126957	0.668174	1.0677	21.1317	< 0.18310546875	6.34889	1.21359	15.9855	24.6124	< 3.515625	68.4669	963.666	50.5592	23.978	14.0557	185.433	15.5802	17.3228	19.8624	63.4167	22.7467	5.81966	37.8564	< 9.619140625	13.1399	8.09519	4.33265	6.82711	12.3948	54.1678	31.1107	1481.95	2.7573	93.4536	14.4972
	58918	40(3,H5)	Unknown209	16.7523	2.47716	0.609126	< 1.66015625	0.893984	61.668	0.149228	3.56042	1.04421	15.2094	21.512	< 3.515625	24.242	43.3959	16.9545	4.78558	6.08506	260.886	27.993	20.6303	24.665	14.6862	16.8144	0.266399	38.3642	< 9.619140625	6.63925	6.69242	4.64911	6.82711	144.264	56.0132	15.1808	2216.96	5.59086	99.7217	10.417
	58919	41(3,A6)	Unknown210	22.2701	3.32701	0.076092	< 1.66015625	0.924037	77.3879	< 0.18310546875	3.68901	1.07327	12.649	19.1006	< 3.515625	26.1265	< 21.337890625	7.44277	5.296	8.47037	313.687	31.3096	20.7867	44.2649	9.81862	17.8156	< 0.59814453125	34.5254	< 9.619140625	20.4963	11.5944	7.73755	4.82424	28.0704	48.3197	30.0906	2912.55	3.42011	104.856	14.4611
	58472	42(3,B6)	Unknown211	109.167	22.4555	15.5179	21.66	1.70066	213.975	1.45177	5.93853	3.00863	98.6048	73.9948	< 3.515625	469.126	400.485	39.2706	11.8816	27.6286	37.0884	OOR	42.2884	29.5583	48.5614	22.4976	2.79071	54.0116	20.3966	63.4628	13.8854	13.0748	41.367	342.468	93.3275	431.063	3355.85	14.3871	560.747	563.715
	58474	43(3,C6)	Unknown212	20.3067	41.3652	2.59388	69.3934	1.32025	19.8996	0.248142	4.17773	1.03698	15.9258	28.2469	< 3.515625	124.898	30.4758	23.8636	5.0606	5.25302	124.362	49.8375	29.5505	22.0617	19.0796	17.0745	0.319102	123.57	< 9.619140625	12.0557	11.8498	3.89053	4.04829	< 6.73828125	430.933	231.562	2569.75	8.38376	298.768	27.0354
	58517	44(3,D6)	Unknown213	OOR	901.125	58.6225	2.13815	43.5253	18.814	< 0.18310546875	2.54729	0.922729	89.1581	249.221	18.3775	> 53200	55.0662	9.48961	4.74623	1052.05	78.3304	35.0299	30.6634	16.7733	30.6842	OOR	0.450549	38.2352	564.347	574.773	50.049	4.03937	6.93727	28.0704	53.2581	4777.13	1493.23	6.9762	234.566	869.088
IL17KO	58127	45(3,E6)	Unknown214	< 1.3427734375	5.9579	0.11452	6.98577	0.353065	36.6515	0.14802	12.5273	0.541835	4.21814	4.20448	< 3.515625	13.7098	75.8915	19.0662	8.64454	11.0744	0.82641	10.4582	14.2443	19.8062	72.329	3.72759	1.33477	58.5813	< 9.619140625	144.783	0.410489	5.0992	12.2751	76.0023	92.6764	15.1808	729.647	5.14274	36.64	8.33762
	58145	46(3,F6)	Unknown215	2.85608	9.51511	0.354009	307.923	0.651543	25.6262	0.1456	26.1259	0.657312	5.78298	3.18539	< 3.515625	109.634	OOR	372.998	79.4799	104.302	< 2.18505859375	3.31324	7.23801	5.45631	229.227	3.26865	26.9645	58.529	< 9.619140625	118.176	2.38581	5.26517	3.12196	91.4501	86.5273	58.7692	333.742	1.73019	< 10.0830078125	7.2431
	58146	47(3,G6)	Unknown216	< 1.3427734375	4.98925	< 0.37841796875	2.62047	0.590218	39.9737	< 0.18310546875	10.8225	0.618287	1.61215	1.17049	< 3.515625	16.4277	1263.9	68.2616	21.1112	10.4042	0.202083	4.92716	12.2642	9.03559	85.1528	3.66383	8.17752	45.5459	< 9.619140625	48.6981	0.345532	4.06895	11.7479	490.78	65.4553	10.3811	116.111	1.74042	14.1076	3.29331
	58515	48(3,H6)	Unknown217	0.321615	2.17259	0.191595	< 1.66015625	0.803525	24.8489	0.199995	11.0981	0.605394	3.43507	8.30808	< 3.515625	27.2544	137.096	21.1404	5.41366	7.5488	< 2.18505859375	10.2115	10.4583	18.0072	44.7818	4.50755	1.56427	42.5655	< 9.619140625	142.986	0.483598	5.42971	< 3.271484375	65.9456	63.3764	16.9232	371.752	2.42062	< 10.0830078125	6.45096
	57944	49(3,A7)	Unknown218	< 1.3427734375	2.70725	< 0.37841796875	1.72616	0.32438	19.4325	< 0.18310546875	7.09602	0.535564	3.74544	0.686853	< 3.515625	9.34984	< 21.337890625	1.69569	3.17898	7.09996	< 2.18505859375	2.87757	3.02538	2.29138	21.7499	1.99082	0.0405397	43.0525	< 9.619140625	59.7991	0.121662	4.27444	4.04829	550.107	54.2439	7.58274	48.2783	0.673429	< 10.0830078125	2.61941
	57945	50(3,B7)	Unknown219	< 1.3427734375	3.05481	0.359833	< 1.66015625	0.276163	31.2479	< 0.18310546875	8.55911	0.495193	4.42489	0.980208	< 3.515625	4.36099	< 21.337890625	3.40626	4.98208	5.66453	< 2.18505859375	3.91687	9.05915	0.512055	33.9553	2.01312	0.167273	59.9374	< 9.619140625	96.997	< 2.07763671875	4.98774	6.37246	4153.06	90.508	15.6238	38.0406	0.304358	< 10.0830078125	2.80102
DKO	57995	51(3,C7)	Unknown220	1.04675	4.11278	0.0604358	4.45971	0.435095	35.0743	< 0.18310546875	3.27481	0.710136	5.28113	3.05338	< 3.515625	20.6416	< 21.337890625	4.99847	4.35154	738.803	11.8727	6.7772	13.4155	1.10217	36.0551	11.5719	0.160645	41.0318	< 9.619140625	268.628	1.059	5.26517	< 3.271484375	446.149	60.3513	8.74999	354.405	2.09117	< 10.0830078125	4.36637
	57996	52(3,D7)	Unknown221	4.19404	2.86137	< 0.37841796875	5.98599	1.03784	64.145	< 0.18310546875	9.03893	0.690223	6.46199	5.05463	< 3.515625	43.4834	455.792	77.9384	23.1569	21.6304	14.0937	6.02992	2.89061	9.9762	81.3737	10.4507	3.54638	72.7298	22.177	313.131	2.5043	11.2342	5.5106	842.085	125.529	34.4307	639.591	1.05397	< 10.0830078125	5.10808
	58143	53(3,E7)	Unknown222	6.02046	3.79711	< 0.37841796875	1.33507	0.839766	32.9607	0.0847388	30.1035	0.922729	23.141	2.04958	< 3.515625	75.6096	OOR	311.734	66.8549	114.41	< 2.18505859375	4.56232	3.09107	11.9736	195.803	3.51471	28.1442	71.4263	< 9.619140625	100.306	1.50864	6.0484	3.51729	279.28	121.789	39.5286	207.902	0.775013	< 10.0830078125	4.47034
	58144	54(3,F7)	Unknown223	0.858208	2.86137	0.0488392	0.895971	0.645426	28.8821	0.0709526	11.1396	0.690223	4.36582	3.89308	< 3.515625	48.689	OOR	150.271	49.7524	8.15971	4.33629	22.4471	25.0734	< 2.490234375	115.149	6.79316	12.9743	50.738	23.7084	183.79	0.974084	4.70601	7.57313	140.716	78.9002	12.3957	602.554	5.65248	187.249	10.2526
	58431	55(3,G7)	Unknown224	9.71824	10.6127	2.16954	11.7434	0.899999	13.1462	0.0181836	7.4335	1.21359	6.69821	21.512	< 3.515625	122.927	129.107	16.9243	9.97697	31.2463	41.7826	7.99162	6.57465	4.96312	72.8738	6.29433	1.89929	57.0209	< 9.619140625	463.339	8.6684	6.07489	7.87689	1144.65	116.556	122.166	648.854	1.71652	< 10.0830078125	7.69396
	58514	56(3,H7)	Unknown225	18.8077	6.85593	0.806993	151.306	0.782346	18.768	0.687093	7.87719	0.787582	7.76151	13.1382	< 3.515625	270.746	121.004	43.4982	4.19282	46.9667	19.0331	7.89646	6.57465	10.9185	41.4987	9.63983	0.935316	71.8227	7.4959	282.765	10.0457	4.41957	10.4826	46.187	184.686	210.61	1008.49	2.05833	< 10.0830078125	24.3276
	58430	57(3,A8)	Unknown226	0.28059	8.01132	0.0998088	1.56243	0.333961	13.3834	0.0355909	14.4587	0.631238	1.76087	2.26643	< 3.515625	29.1304	788.616	59.212	54.1292	8.00567	0.510555	4.25109	2.29368	5.12744	57.2441	2.99954	4.91775	43.7171	< 9.619140625	154.39	0.483598	5.48425	< 3.271484375	909.063	71.8799	20.2096	89.5248	0.737358	< 10.0830078125	3.34133
	58943	58(3,B8)	Unknown227	OOR	565.866	63.2451	< 1.66015625	2.5801	20.9967	< 0.18310546875	6.62241	0.901637	37.6733	371.802	7.85022	11417.2	70.2698	20.5086	5.0606	732.756	165.152	9.83706	14.5218	1.42556	140.935	29.1574	0.761843	68.1074	55.5955	OOR	70.2049	4.06895	12.5701	870.887	130.271	1295.77	1082.58	2.6637	7.05293	820.07
	58562	59(3,C8)	Unknown228	4.45572	15.0432	2.83863	53.5294	1.12136	12.0696	< 0.18310546875	8.41999	0.958117	4.80876	33.7542	< 3.515625	114.111	283.574	51.4522	6.87102	11.159	169.366	13.264	10.1723	70.6973	103.085	26.6774	2.87032	66.5219	< 9.619140625	364.285	16.4573	6.02187	3.51729	19.4128	106.809	98.8265	2207.42	4.59639	30.2284	16.7835
	58560	60(3,D8)	Unknown229	1.59024	10.6976	0.530885	55.8127	0.803525	34.5624	0.0666859	3.58194	0.940387	5.25161	8.28507	< 3.515625	53.8985	< 21.337890625	8.47333	6.3962	13.1572	39.4982	4.18139	4.77574	15.8775	16.1363	8.35506	0.305934	41.6384	< 9.619140625	272.504	2.91975	5.23761	5.6399	15.8891	70.8915	34.4307	499.511	0.572061	< 10.0830078125	5.71279
