# Supplementary material for: Tonic interferon restricts pathogenic IL-17-driven inflammatory disease via balancing the microbiome
Source: eLife journal article supplement (doi:10.7554/elife.68371), 2021-08-11
Supplement: supp [file elife-68371-supp-v1.zip › elife_poa_e68371_Figure_7_figure_supplement_3.pdf]

Figure 7-figure supplement 3

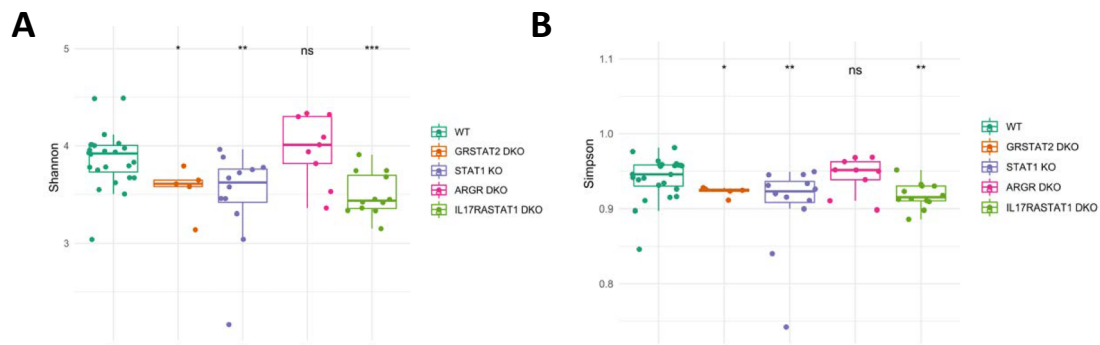

**Figure 7-figure supplement 3:** 16S rRNA sequencing of fecal DNA samples from WT, GR STAT2 DKO, STAT1 KO, ARGR DKO, and IL17R STAT1 DKO mice (n=5-21 animals/strain).

A- Alpha diversity as estimated by Shannon index (Kruskal-Wallis p=0.00025)

B- Alpha diversity as estimated by Simpson index (Kruskal-Wallis p=0.0037)
