# Supplementary material for: Tonic interferon restricts pathogenic IL-17-driven inflammatory disease via balancing the microbiome
Source: eLife journal article supplement (doi:10.7554/elife.68371), 2021-08-11
Supplement: supp [file elife-68371-supp-v1.zip › elife_poa_e68371_Figure_7_source_data_1.xlsx]

## Sheet: Fig 7A
			WT					STAT1 KO
	FOXP3+	9.9	10.8	11.1	14.8		0.0005	0.03	0.007	0.068

## Sheet: Fig 7B
				WT									STAT1 KO									STAT1 IL17R DKO											IL17R KO
WBC	12.93	10.14	11.51	9.21	7.91	8.76		252.61	132.95	210.66	152.98	198.34	100.67	103.99	242.55	145.8	142.48		11.14	18.89	9.97	11.91	11.1	9.76	14.6	15.56	15.02		8.67	5.6	7.24	8.61	7.48	11.57	8.13	7.28	7.41	8.22
Neutrophils	1.75	1.02	1.3	1.56	1.07	1.37		136.46	59.64	92.21	46.42	100.9	46.67	45.8	120.74	73.04	70.51		1.2	2.31	1.52	2.74	1.64	4.03	2.17	3.14	2.25		0.84	0.66	0.76	1.02	0.67	2.47	0.8	0.64	0.68	1.41
Monocytes	0.15	0.13	0.22	0.23	0.16	0.24		13.53	7.09	14.31	5.44	9.73	5.75	5.01	6.91	6.19	5.98		0.28	0.64	0.31	0.49	0.38	0.38	0.4	0.45	0.35		0.3	0.02	0.1	0.04	0.11	0.44	0.1	0.11	0.07	0.28

## Sheet: Fig 7C
			WT				STAT1 KO					STAT1 IL17R DKO
B cells	48.3	68.8	41.4	49.8		18.4	22.1	19	11.2		48.1401	29.418	36.4859	23.4435
CD4 naive	5.9	1.15	6.95	10.1		1.88	0.49	0.64	0.92		2.80999	3.14093	2.31631	8.96181
CD4 effector	2.19	0.59	2.21	1.64		19.4	4.82	11.7	13.7		1.27804	5.05028	4.18979	13.5591
CD4 memory	14.1	1.86	15	7.65		0.73	0.16	0.22	0.17		0.126957	0.217926	0.0841565	0.162468
CD8 naive	12.1	4	12.4	9.21		2.71	0.69	0.75	1.24		0.315277	2.89702	1.54888	3.68662
CD8 effector	0.25	0.63	0.3	0.39		4.92	0.81	0.87	2.66		0.973339	7.84533	14.4168	14.935
CD8 memory	3.56	2.73	3.22	1.82		0.44	0.09	0.1	0.17		0.126957	1.1836	0.332619	0.595716
NK cells	2.76	4.81	4.19	3.43		1.05	0.85	1.34	1.11		3.28	0.55297	0.330895	0.360292
Monocytes	0.44	1.12	0.73	0.6		2.29021	4.82063	3.00347	3.16785		2.02753	2.28003	1.63924	0.991862
Neutrophils	5.57	5.36	5.83	7.82		33.6	53.4	52	45.1		9.96185	13.4271	15.2125	12.1609

## Sheet: Fig 7D
			WT						STAT1 KO					STAT1 IL17R DKO
LK	0.438671	0.533302	0.406251	0.45069	0.564969		0.443877	0.497202	0.346255	0.369753	0.264254		0.263774	0.342464	0.330452	0.361497
CMP	0.00714004	0.00993341	0.00575974	0.012985	0.0105283		0.0579804	0.138108	0.0342089	0.0406007	0.104924		0.0685977	0.0830104	0.102484	0.106364
GMP	0.0409264	0.0412006	0.0456155	0.035878	0.0392171		0.297042	0.275421	0.222725	0.214052	0.094604		0.0464694	0.0592321	0.0544347	0.0636848
MEP	0.368043	0.452662	0.32078	0.366626	0.482777		0.0392706	0.018193	0.0531839	0.0811713	0.0201631		0.134212	0.176956	0.147733	0.162713
LSK	0.0624201	0.0624925	0.0729007	0.0447705	0.0647356		0.12958	0.159694	0.108836	0.118119	0.0324265		0.0131029	0.0133557	0.0204904	0.0201876
HSC	0.00184022	0.00196992	0.00306906	0.00169236	0.00227005		0.00390062	0.00530628	0.00478231	0.00389405	0.00305791		0.00318249	0.00350267	0.00465838	0.00509236

## Sheet: Fig 7E
			WT				STAT1 KO					STAT1 IL17R DKO
B cells	53.1644	71.7281	60.5541	68.8646		159.994	136.371	160.928	218.484		28.9794	41.2805	34.3871	32.6433
CD4 naive	0.0971867	0.310004	0.317606	2.76176		0.741038	0.426709	0.616753	0.783757		1.87068	2.5667	2.28621	2.49037
CD4 effector	5.63035	14.0307	2.77834	7.47558		71.3867	47.9421	82.5567	77.0387		14.7964	20.3588	13.4367	19.2812
CD4 memory	0.330435	3.89824	0.263241	6.56958		0.599888	0.200804	0.308376	0.507137		4.27262	3.81854	4.2718	3.8803
CD8 naive	0.0453538	1.03986	0.117314	5.68547		0.14115	0.125503	0.198242	0.13831		4.72982	3.9039	1.53544	3.1147
CD8 effector	2.24501	3.51745	1.89992	0.890679		11.292	24.8997	13.899	28.3074		3.20849	5.22281	3.72453	7.02988
CD8 memory	0.0615516	3.22209	0.140205	2.37223		0.105863	0.0753016	0.110134	0.0922067		1.46177	1.50791	0.972756	1.53991
NK cells	2.00891	3.16267	1.05041	0.78203		3.50702	1.49257	1.38569	2.51144		0.104899	0.249703	0.175736	0.230353
Monocytes	0.55253	1.31927	0.748306	0.861701		71.4763	38.0012	55.1028	28.1792		2.06979	1.38507	1.15484	1.13144
Neutrophils	6.02673	7.33797	1.09902	1.62486		299.566	266.387	182.023	160.924		5.31069	2.94766	1.97592	2.9099

## Sheet: Fig 7F
			WT				STAT1 KO					STAT1 IL17R DKO
LK	0.0569535	0.129494	0.195963	0.13242		1.37404	3.0268	1.83676	1.85186		0.0547044	0.115673	0.0845126	0.0891822
CMP	0.0164188	0.035114	0.0530733	0.00190837		0.111022	0.322233	0.264042	0.172631		0.0109085	0.0225373	0.018755	0.0219884
GMP	0.00509639	0.0164436	0.0199462	0.0119803		0.0575721	0.330661	0.29188	0.306202		0.00213638	0.00334149	0.00289044	0.00268387
MEP	0.0276361	0.0554973	0.0639212	0.0794094		1.04289	1.66258	0.852301	0.833162		0.0299094	0.060218	0.0428311	0.0435887
LSK	0.00341511	0.00599508	0.0170301	0.0318062		0.0898806	0.832411	0.652653	0.901517		0.00572939	0.0031993	0.00394151	0.00540008
HSC	0.00018389	0.00017129	0.00139973	0.00127225		0.0332558	0.0486018	0.0323374	0.0373162		0.00304273	0.00042657	0.00095253	0.00158445
